# Supplementary material for: Host Response of Atlantic Salmon (Salmo salar) Re-Inoculated with Paramoeba perurans
Source: MDPI journal article supplement (doi:10.3390/microorganisms9050993), 2021-05-05
Supplement: s1 [file s1]

A

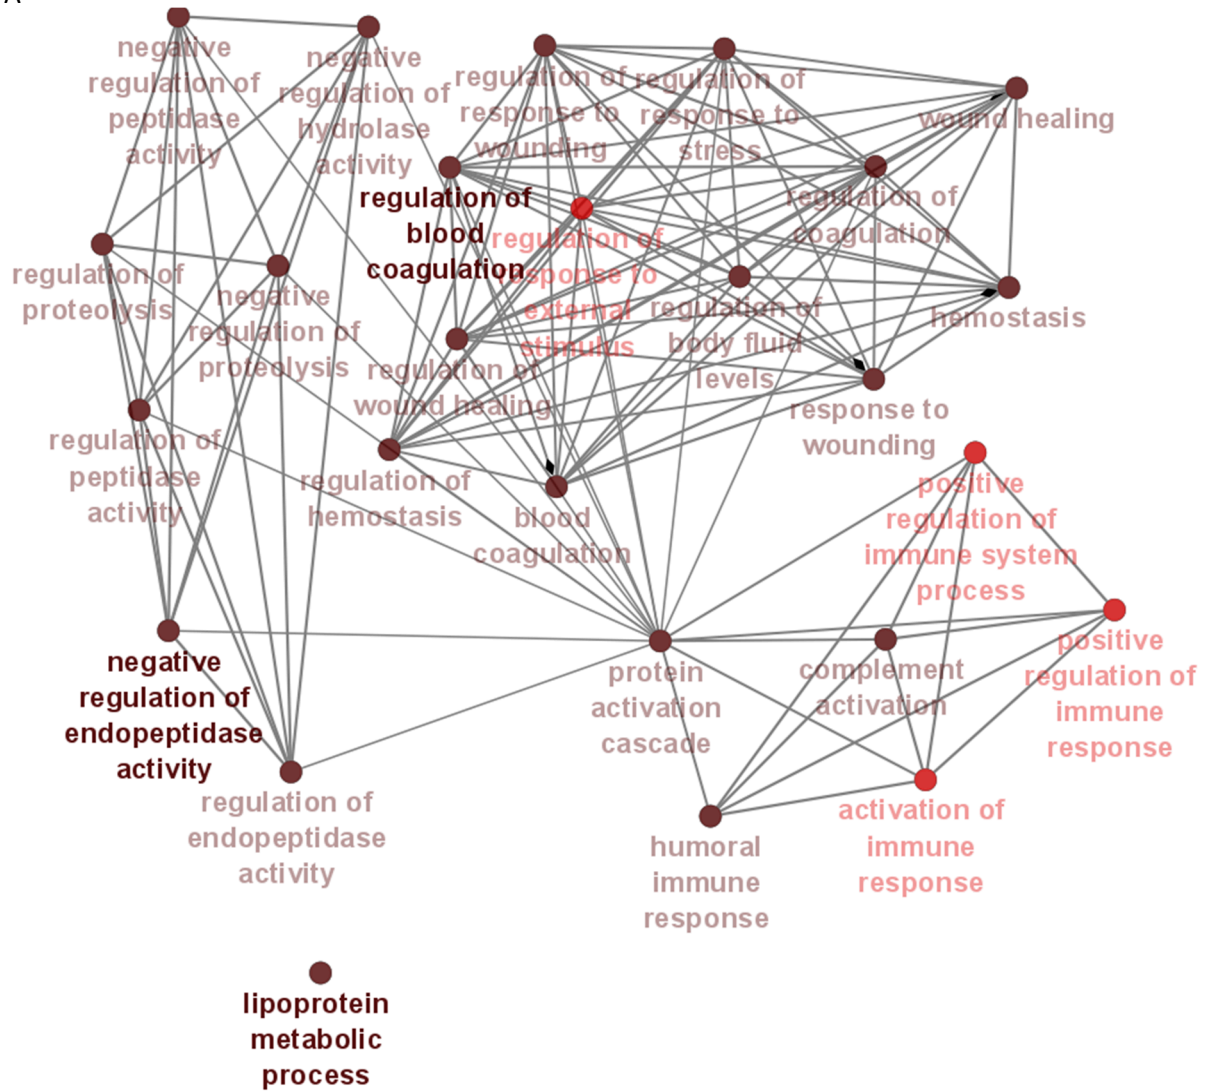

B

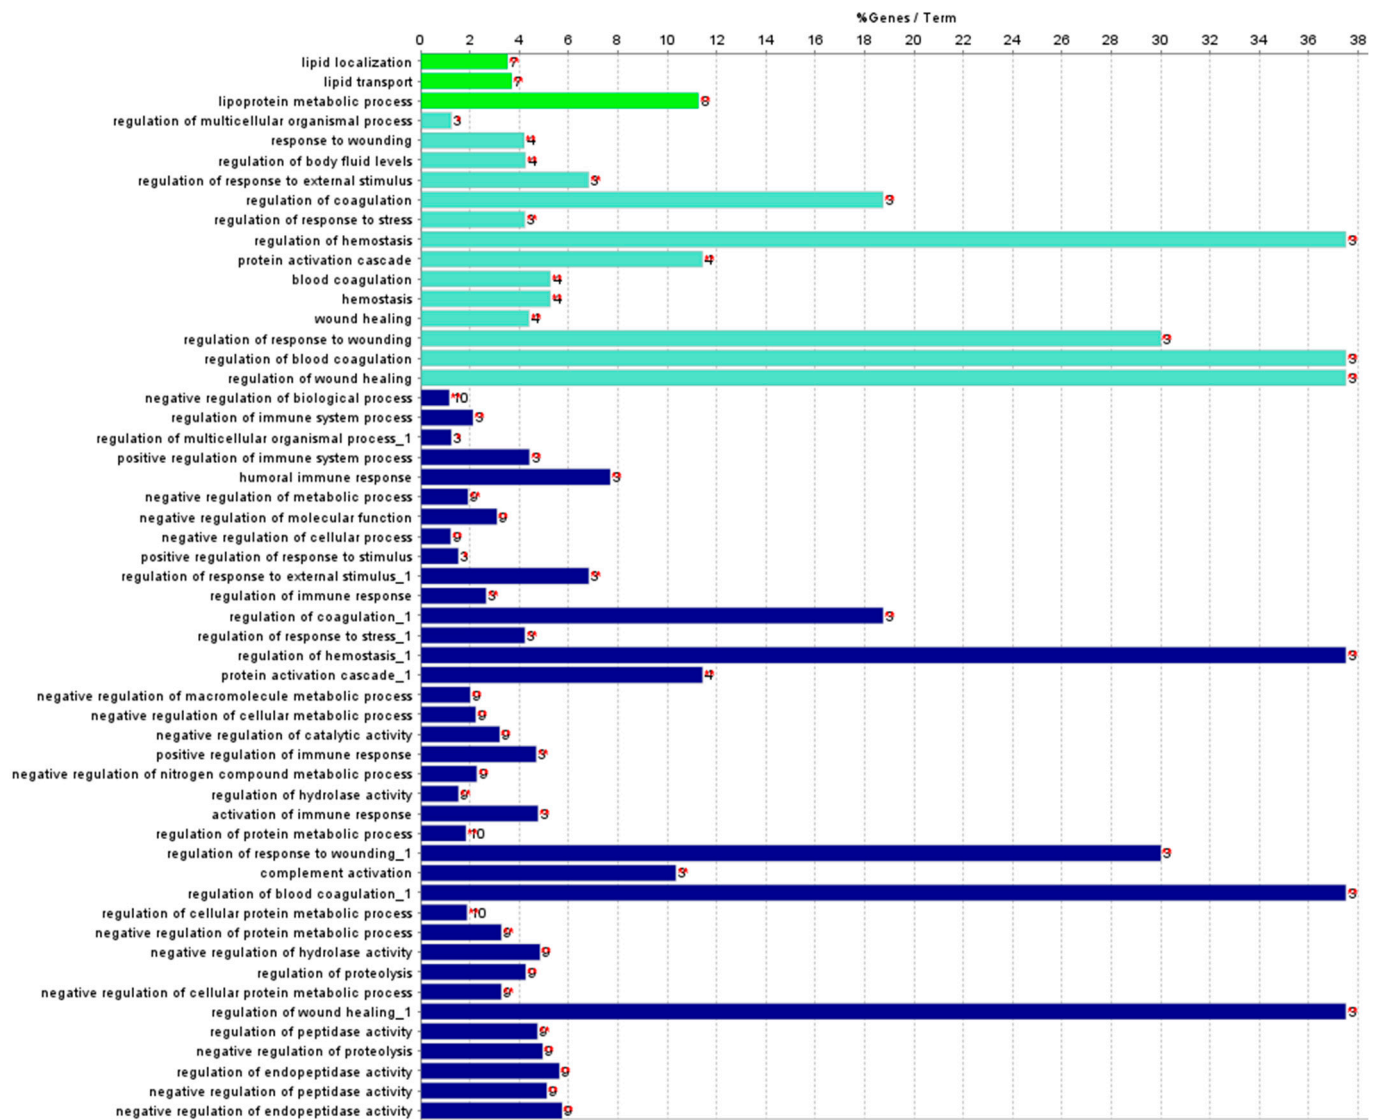

**Figure S1.** Network (A) and Bar- graph (B) representations of ClueGO analysis of the key biological processes linked to those proteins which demonstrated a t-test difference of at least +/- 1.5 between T0 and T4.
